# Supplementary material
Source: publisher figshare collection journal article supplement (https://plos.figshare.com/articles/dataset/_/137514)
Supplement: Supplementary file [file 1]

A

c.2229C>T  
↓  
tgccactaca aggtaacctt ttctctgcag GAATAAAGCC GGCTGGTTGG ACAGCGAACT CAACATGTTC ACCCACCAGT ACCTGCAGCC CAGCAGATAG

B

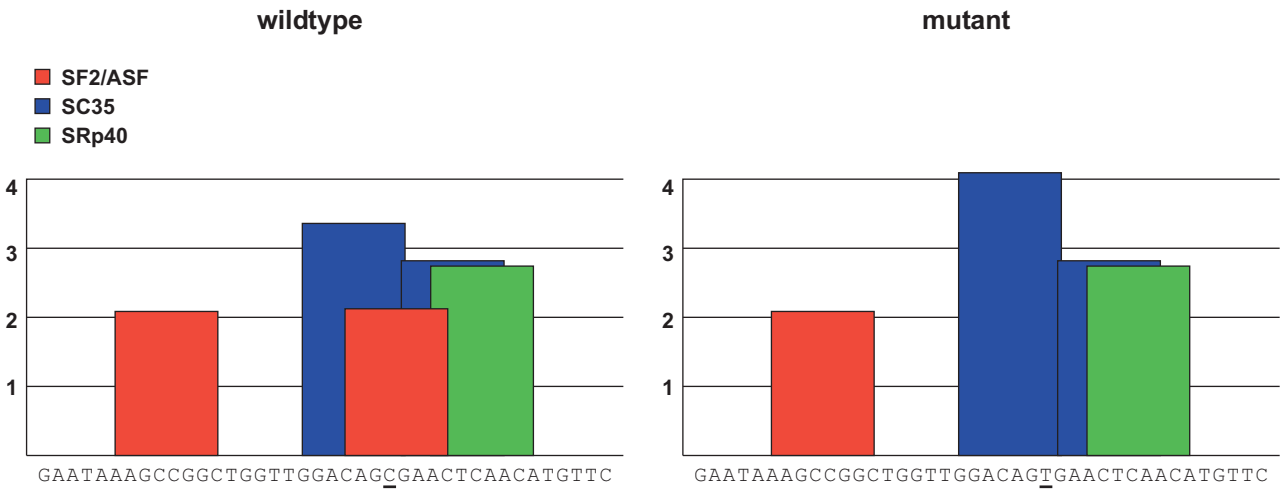

| Splicing factor | Position | Binding site      | Score (wildtype/mutant) |
|-----------------|----------|-------------------|-------------------------|
| SF2/ASF         | 6-12     | AAGCCGG           | 2.12 / 2.12             |
| SF2/ASF         | 22-28    | CAGC <u>G</u> AA  | 2.17 / --               |
| SC35            | 19-26    | GGACAGC <u>G</u>  | 3.41 / 4.05             |
| SC35            | 26-33    | GA <u>A</u> CTCAA | 2.85 / 2.85             |
| SRp40           | 28-34    | ACTCAA <u>C</u>   | 2.82 / 2.82             |
